# Supplementary material for: Development of a risk-predicting score for hip preservation with bone grafting therapy for osteonecrosis
Source: PubMed Central journal article supplement — iScience. 2024 Feb 27;27(4):109332. doi: 10.1016/j.isci.2024.109332 (PMC10946322; doi:10.1016/j.isci.2024.109332), 2024-02-27
Supplement: mmc1.pdf [file mmc1.pdf]

iScience, Volume 27

## **Supplemental information**

### **Development of a risk-predicting score for hip preservation with bone grafting therapy for osteonecrosis**

**Shengbao Chen, Kai Fu, Qianying Cai, Yong Feng, Haiyan He, Yun Gao, Zhenzhong Zhu, Dongxu Jin, Jiagen Sheng, and Changqing Zhang**

---

## Supplementary Materials

**Figure S1.** AUROCs for predicting accuracy of the THA risk and calibration plots for the risk-score model of predicting 5-, 10-, and 15-year THA risk at validation data, related to Figure 1. A.) AUROCs for predicting accuracy of THA risk B.) Calibration plots for the risk-score model for predicting THA risk.

**Figure S2.** Nam-D'Agostino test results of score indicating appropriate agreement between the observed and predicted THA in the test and validation data sets, related to *STAR Methods*. A.), B.): internal validation (N=589); C.), D.): Entire cohort (N=1179); each group contains 5 or more events.

**Figure S3.** The AUC values for predicting accuracy of THA risk at 5-, 10- year, and 15- year in population of sensitivity analysis, related to Figure 3.

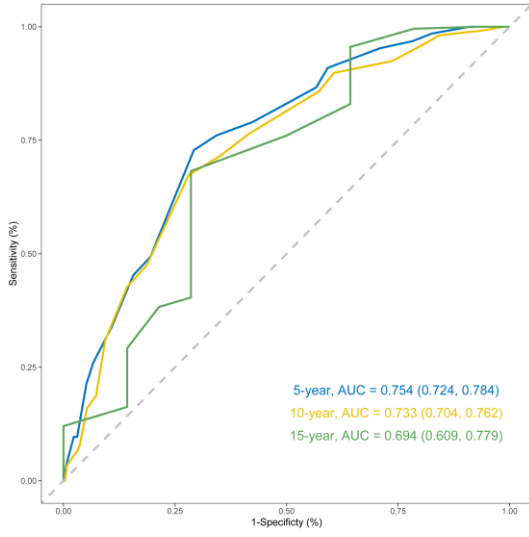

A

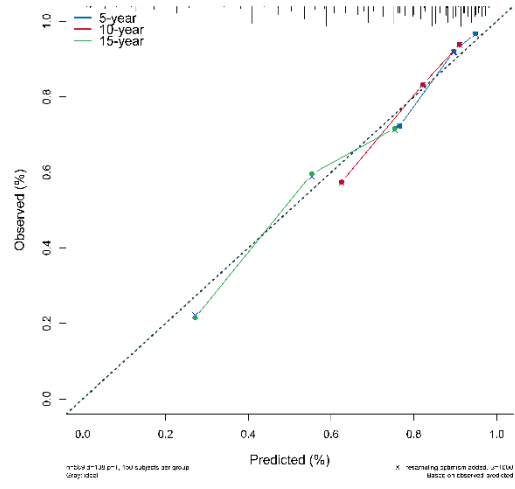

B

Figure S1.

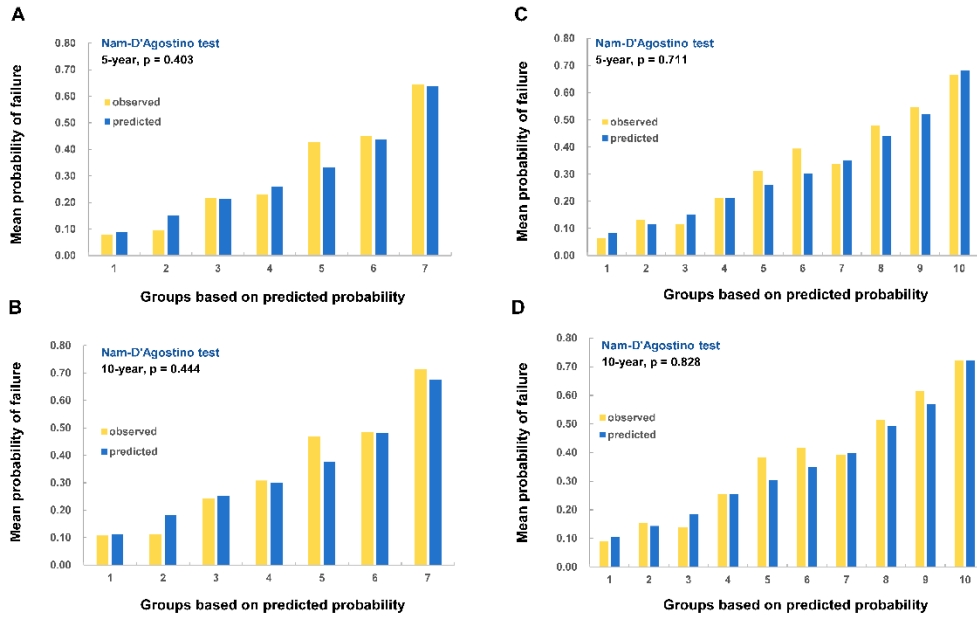

Figure S2.

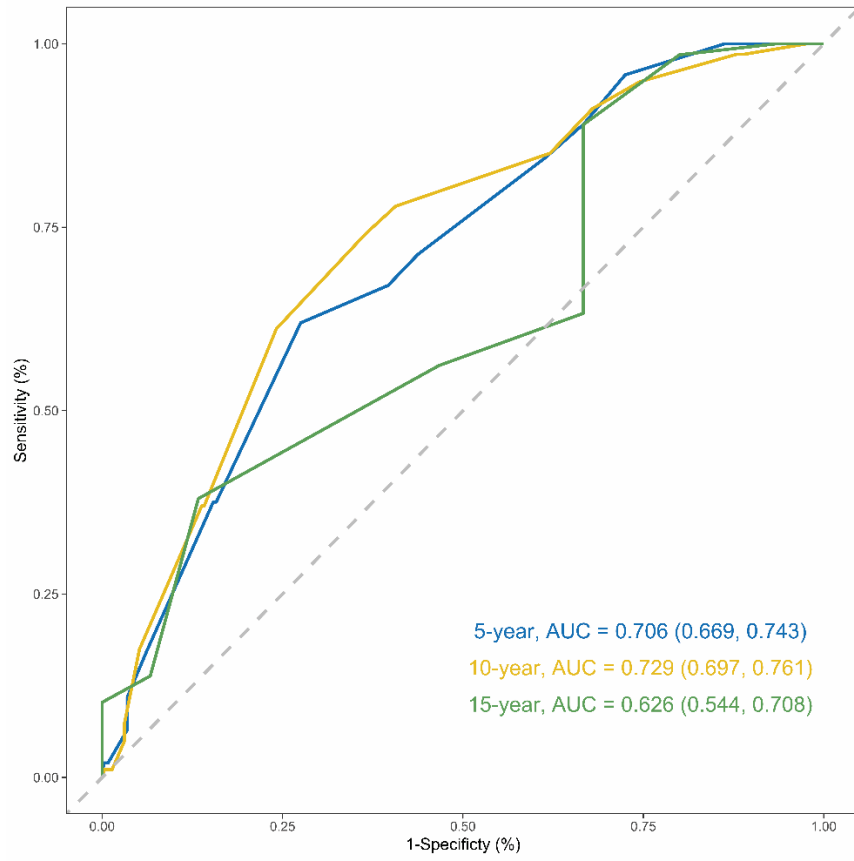

Figure S3.
